# Supplementary material for: Impact of Adipose-Derived Mesenchymal Stem Cells (ASCs) of Rheumatic Disease Patients on T Helper Cell Differentiation
Source: MDPI journal article supplement (doi:10.3390/ijms23105317), 2022-05-10
Supplement: s1 [file s1]

# Impact of Adipose-Derived Mesenchymal Stem Cells (ASCs) of Rheumatic Disease Patients on T Helper Cell Differentiation

Ewa Kuca-Warnawin <sup>1,\*</sup>, Magdalena Plebańczyk <sup>1</sup>, Marzena Ciechomska <sup>1</sup>, Marzena Olesińska <sup>2</sup>, Piotr Szczesny <sup>2</sup> and Ewa Kontny <sup>1</sup>

<sup>1</sup> Department of Pathophysiology and Immunology, National Institute of Geriatrics, Rheumatology and Rehabilitation, Spartańska 1, 02-637 Warsaw, Poland; magdalena.plebanczyk@spartanska.pl (M.P.); marzena.ciechomska@gmail.com (M.C.); ewa.kontny@spartanska.pl (E.K.)  
<sup>2</sup> Clinic of Connective Tissue Diseases, National Institute of Geriatrics, Rheumatology and Rehabilitation, 02-637 Warsaw, Poland; marzena.olesinska@spartanska.pl (M.O.); piotr.szczesny@spartanska.pl (P.S.)  
 \* Correspondence: ewa.kuca-warnawin@spartanska.pl

**Table S1.** Expression of transcription factors, cytokines and Tregs in resting and activated T cells and PBMCs

|                                                 | CD4 <sup>+</sup> T cells |           |         | PBMCs       |             |         | CD4 <sup>+</sup> T cells vs PBMCs<br>P value |           |
|-------------------------------------------------|--------------------------|-----------|---------|-------------|-------------|---------|----------------------------------------------|-----------|
|                                                 | Resting                  | Activated | P value | Resting     | Activated   | P value | Resting                                      | Activated |
| <b>Transcription factors (mRNA)<sup>§</sup></b> |                          |           |         |             |             |         |                                              |           |
| T-bet                                           | 0.86±0.09                | 1.72±0.07 | ***     | 2.0±0.14    | 1.026±0.02  | ****    | ###                                          | ###       |
| GATA3                                           | 1.73±0.31                | 1.3±0.2   | *       | 1.625±0.06  | 1.006±0.04  | ****    | ns                                           | ns        |
| RORc                                            | 1.68±0.16                | 2.6±0.66  | ns      | 0.773±0.06  | 1.034±0.13  | ****    | ##                                           | ns        |
| FoxP3                                           | 2.16±0.5                 | 0.8±0.02  | ns      | 1.675±0.18  | 1.183±0.097 | *       | ns                                           | ns        |
| R1                                              | 0.28±0.04                | 7.2±0.7   | ***     | 1.218±0.076 | 1.104±0.07  | ns      | ###                                          | ###       |
| R2                                              | 1.77±0.23                | 0.47±0.1  | ***     | 1.45±0.19   | 1.047±0.15  | ns      | ns                                           | ns        |
| <b>Cytokines (pg/ml)</b>                        |                          |           |         |             |             |         |                                              |           |
| IFN $\gamma$                                    | 16.5±4.05                | 3756±237  | ***     | 210.4±117   | 918±153     | ***     | ns                                           | ###       |
| IL-4                                            | 0.48±0.06                | 79.3±8.6  | ***     | 0±0         | 3.05±0.7    | ***     | ###                                          | ###       |
| IL-17AF                                         | 0±0                      | 642±130   | ***     | 0±0         | 256±24      | ***     | ns                                           | ns        |
| <b>Treg cells (%)</b>                           | 0.7±0.21                 | 23.8±1.9  | ***     | 1.98±0.25   | 3.43±0.12   | ns      | ns                                           | ###       |

The values are the mean  $\pm$  SEM; \*/#P = 0.05-0.01, \*\*/#P = 0.01-0.001, \*\*\*/###P = 0.001-0.0001, \*\*\*\*/###P < 0.0001;

§ - relative quantification; R 1- T-bet/GATA3 ratio; R2 – RORc/FoxP3 ratio.
